# Supplementary material for: Cross-Border Collaboration in River Management: Views on Participation in a Dutch-German Case Study
Source: Springer Nature journal article supplement (doi:10.1007/s11269-018-2039-9), 2018-07-16
Supplement: MOESM1 [file 15957942]

**Supplementary data to paper**

**Cross-border collaboration in river management: views on participation in a Dutch-German case study**

**1 Description of the human-nature relationships**

The Human and Nature scale distinguishes four relationships with nature: mastery over nature, stewardship of nature, partnership with nature and participation in nature (van den Born 2007; van den Born 2008).

Table SD1: Visual representation and description of the human-nature relationship from the HaN scale, according to Fliervoet et al, 2013.

| **Visual representation** | **Relationship** | **Description** |
| --- | --- | --- |
| 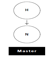 | Mastery over nature | Humans stand above nature and can use it to their benefit without being worried about nature's fragility. Economic growth and technology will solve potential environmental issues. |
| 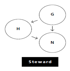 | Stewardship of nature | Humans stand above nature and have a responsibility to care for it. This responsibility is directed towards god (religious version) or future generations (secular version). |
| 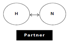 | Partnership with nature | As natures’ partner, humans stand side by side with nature, acknowledging nature’s independent value. In a dynamic process the two mutually develop. |
| 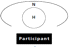 | Participation in nature | Humans are part of nature in a biological as well as spiritual sense. Nature is an important part of human identity. |
